1 **Title:** Rapid seasonal evolution in innate immunity of wild *Drosophila melanogaster*

2

3 **Authors:** Behrman, Emily L.<sup>1,2</sup>, Virginia M. Howick<sup>3,4</sup>, Martin Kapun<sup>5</sup>, Fabian Staubach<sup>6,7</sup>, Alan  
4 O. Bergland<sup>6,8</sup>, Dmitri A. Petrov<sup>6</sup>, Brian P. Lazzaro<sup>3</sup> and Paul S. Schmidt<sup>1</sup>.

5

6 **Author Affiliations:**

7 1. Department of Biology, University of Pennsylvania, 433 S. University Ave. Philadelphia, PA  
8 19104

9 2. Janelia Farms Research Campus, Howard Hughes Medical Institute, 19700 Helix Drive  
10 Ashburn, VA 20147

11 3. Department of Entomology, Cornell University 3125 Comstock Hall Ithaca, NY 14853

12 4. Wellcome Trust Sanger Institute, Hinxton, University of Cambridgeshire, CB10 1AS, UK

13 5. Department of Ecology and Evolution, University of Lausanne, Lausanne 1015

14 6. Department of Biology, Stanford University 371 Serra St, Stanford, CA 94305-5020

15 7. Albert-Ludwigs University, Freiburg, Germany

16 8. Department of Biology, University of Virginia, 409 McCormic Rd Charlottesville, VA 22904

17

18 **Corresponding Author:**

19 Emily L. Behrman

20 Email Address: Behrmane@janelia.hhmi.org

21 Mailing address: 19700 Helix Drive

22 Ashburn, VA 20147

23 Phone: 571-209-4000

24

25

26

27

28 **Keywords**

29 Rapid adaptation, innate immunity, *Drosophila melanogaster*, *Thioester-containing protein 3*,

30 *Drosomycin-like 6*, Epistasis, *Providencia rettgeri*, *Enterococcus faecalis*

31

32

33

34 **Abstract**

35 Understanding the rate of evolutionary change and the genetic architecture that facilitates rapid  
36 adaptation is a current challenge in evolutionary biology. Comparative studies show that genes  
37 with immune function are among the most rapidly evolving genes in a range of taxa. Here, we  
38 use immune defense in natural populations of *D. melanogaster* to understand the rate of  
39 evolution in natural populations and the genetics underlying the rapid change. We probed the  
40 immune system using the natural pathogens *Enterococcus faecalis* and *Providencia rettgeri* to  
41 measure post-infection survival and bacterial load of wild *D. melanogaster* populations collected  
42 across seasonal time along a latitudinal transect on the eastern North America (Massachusetts,  
43 Pennsylvania, and Virginia). There are pronounced and repeatable changes in the immune  
44 response over approximately 10 generations between the spring and fall populations with a  
45 significant but less distinct difference among geographic locations. Genes with known immune  
46 function are not enriched among alleles that cycle with seasonal time, but the immune function  
47 of a subset of seasonally cycling alleles in immune genes was tested using reconstructed outbred  
48 populations. We find that flies containing seasonal alleles in *Thioester-containing protein 3*  
49 (*Tep3*) have different functional responses to infection and that epistatic interactions among  
50 seasonal *Tep3* and *Drosomycin-like 6 (Dro6)* alleles produce the immune phenotypes observed in  
51 natural populations. This rapid, cyclic response to seasonal environmental pressure broadens our  
52 understanding of the complex ecological and genetic interactions determining the evolution of  
53 immune defense in natural populations.

54 **Introduction**

55           The rate at which populations respond to environmental change is a fundamental  
56 parameter in the process of adaption. Evolution is historically considered to be an innately slow  
57 process that occurs over very long timescales [1], but there are now examples that evolutionary  
58 change can occur much faster [2-5]. The limits of how fast populations evolve and the genetic  
59 architecture underlying rapid evolution remain unclear [6]. The classical approach to infer  
60 adaption through the association of traits and genotypes that co-vary along spatial environmental  
61 gradients (e.g., latitude, longitude, altitude) [7] can be expanded across temporal environmental  
62 gradients to provide insight to the rate of adaption in the wild.

63           The biotic environment may shape the rate of adaptation through the immune system,  
64 which sits at the crucial interface between an organism's external and internal environment.  
65 Strong selection imposed by pathogens may result in rapid evolution of immune defense in  
66 nature because microbotic infection directly affects host fitness with consequences ranging from  
67 resource reallocation away from other functions to host mortality [8-23]. Comparative studies  
68 across a broad range of taxa indicate that genes with immune function are among the most  
69 rapidly evolving genes in the genome [24-31]. *Drosophila melanogaster* immune genes show  
70 evidence of local adaptation across large spatial gradients with high levels of population  
71 differentiation and latitudinal enrichment across multiple continents [32-35]. There is less  
72 evidence for differentiation at smaller spatial scales [36,37], although some screens of infection  
73 response in *D. melanogaster* indicate continental differences in defense quality [36]. Thus,  
74 immune defense in natural populations of *D. melanogaster* is a good system to study the how  
75 fast natural populations can evolve and genetics underlying the rapid change.

76 We predict seasonal variation in *D. melanogaster* immune defense even in the absence of  
77 established clinal differences in performance. Seasonal climatic changes produce predictable  
78 environmental gradients over a temporal scale that select for different phenotypes [38,39] and  
79 allele frequencies [40,41] in multivoltine organisms like *D. melanogaster*. Abiotic variables  
80 (e.g., temperature) that cycle across seasons can influence microbial growth, so it is possible that  
81 microbial communities and pathogen diversity that vary over spatial gradients [42-49] also  
82 change as a function of seasonal time [50-53]. Changes in pathogen diversity and frequency  
83 across seasons may select for immune resistance or tolerance in either or both of the primary  
84 humoral immune pathways: the Toll pathway that is preferentially activated by Gram-positive  
85 bacteria or the IMD pathway that is primarily activated by Gram-negative bacteria [54].

86 We tested whether innate immunity evolves seasonally in mid-Atlantic *D. melanogaster*  
87 populations in North America (Massachusetts, Pennsylvania, and Virginia). We found that  
88 immune defense changed rapidly and repeatedly from spring to fall, and that seasonally cycling  
89 alleles of immune genes determine seasonal variation in resistance to and tolerance of infection.  
90 We used reconstructed outbred populations to show that epistatic interactions among seasonally  
91 cycling SNPs produced the immune phenotypes observed in natural populations. This rapid,  
92 cyclic response to seasonal environmental pressure broadens our understanding of the complex  
93 ecological and genetic interactions determining the evolution of immune defense in natural  
94 populations.

95

96

97

98

99 **Methods**

100 **Experimental Model Details**

101 *Wild Drosophila Samples*

102 Wild *D. melanogaster* were collected by direct aspiration both in early July (Spring  
103 population) and late October (Fall population) at three locations spaced evenly along a 4°  
104 latitudinal gradient: George Hill Orchard in Lancaster, MA (42.500493°N, -71.563580°E),  
105 Linvilla Orchards in Media, PA (39.884179°N, -75.411227°E) and Carter Mountain Orchard in  
106 Charlottesville, VA (37.991851°N, -78.471630°E). Collections were repeated across two years.  
107 Isofemale lines were established from wild-caught inseminated females and were maintained on  
108 standard cornmeal molasses food under controlled laboratory conditions (25°C, 12L:12D) on a  
109 three-week transfer cycle for 6-8 generations before immune assessment.

110

111 *Recombinant outbred population cages*

112 Recombinant outbred populations [55] fixed for specific seasonal allele combinations in a  
113 randomized genetic background were constructed using lines from the Drosophila Genetics  
114 Reference Panel (DGRP) [56]. Ten gravid females from 15 lines were pooled to lay eggs for 48  
115 hours for each combination of seasonal alleles. The offspring were permitted to mate freely for at  
116 least 10 subsequent non-overlapping generations before immune assessment. This produced  
117 populations fixed for the alleles of interest in a heterogeneous unlinked background. The immune  
118 function of the two SNPs in *Thioester-containing protein 3* (*Tep3*) was tested using three  
119 genotypes that combined 2L:7703202 and 2L:7705370 (*D. melanogaster* reference genome  
120 v.5.39) spring and fall alleles: (1) *Tep3*<sup>TG</sup> contained spring alleles for both 2L:7703202 and  
121 2L:7705370, (2) *Tep3*<sup>TT</sup> contained the spring 2L:7703202 and the fall 2L:7705370 modifier allele  
122 and (3) *Tep3*<sup>CT</sup> contained fall alleles for both SNPs. The final combination of the fall 2L:7703202

123 coding allele and the spring *2L:7705370* modifier allele was too rare in the DGRP to create the  
124 recombinant populations. Two independent biological replicate populations were created for  
125 each of the three *Tep3* genotypes. Epistatic interactions between *Tep3* and either *Fas-associated*  
126 *death domain (Fadd)* or *Drosomycin-like-6 (Dro6)* were assessed in the same way with  
127 recombinant outbred populations fixed for either both spring or both fall *Tep3* alleles and either  
128 *Fadd* or *Dro6* alleles.

129

### 130 *Fly husbandry*

131 Flies were reared in standard laboratory conditions (25°C, 12:12 L:D) at controlled  
132 density in vials. Male flies were collected for infection at 3-5d using light CO<sub>2</sub> anesthesia. Flies  
133 were stored in groups of 10 after infection.

134

### 135 **Method Details**

#### 136 *Immune survival*

137 Quality of immune defense was probed using systemic bacterial infection [57] with  
138 Gram-negative *Providencia rettgeri* [58] and Gram-positive *Enterococcus faecalis* [59] strains  
139 that were originally isolated from infected wild-caught *D. melanogaster*. Post-infection survival  
140 was measured in males over two repeated blocks of five consecutive days after infection.  
141 Mortality was highest in the first 24h and plateaued (Figure S2) so the final mortality 5d post  
142 infection was analyzed in the model. Flies were infected with cultures started with a single  
143 colony grown to saturation in LB media at 37°C with shaking overnight and diluted to A<sub>600nm</sub> of  
144 1.0. Infections were delivered at a dose of 10<sup>3</sup> to 10<sup>4</sup> bacteria to each CO<sub>2</sub>-anesthetized fly by  
145 inoculating the lateral thorax with a 0.15 mm minute pin (Fine Scientific Tools) dipped into

146 bacterial culture [57]. Two controls were used: a sterile wound by a needle disinfected in 95%  
147 ethanol and unwounded flies anesthetized on CO<sub>2</sub> for the duration of the infection.

148

#### 149 *Bacterial load*

150 The systemic bacterial load of infected flies was quantified using the same infection  
151 method as was described above for survival of infection. When evaluating the natural  
152 populations, 20 lines from each of the 3 collection locations were infected during a 9a-12p daily  
153 infection window. All infections were repeated over two consecutive days by two infectors and  
154 the infector and infection order was randomized daily using a random number system. Twelve  
155 males from each line were infected each day and maintained in vials with food at 25°C,  
156 12:12(L:D). The infected flies were measured for bacterial load at 24h after infection. Up to 3  
157 replicate groups of 3 flies were homogenized in 500 mL of LB for the 2012 natural populations  
158 and up to three single flies were homogenized in 500 mL of PBS for the 2014 natural and  
159 recombinant populations. The samples were then plated on LB agar plates at a dilution of 1:100  
160 for *P. rettgeri*, 1:10 for *E. faecalis* natural populations and 1:1 for the recombinant populations  
161 using a Whitley Automatic Spiral Plater (Don Whitley Scientific, Shipley, UK). The plates were  
162 incubated overnight at 37°C and the number of colony forming units on each plate was counted  
163 using the ProtoCOL3 automated plate counter (Synbiosis, Cambridge, UK). The number of  
164 colonies was used to calculate the concentration of bacteria in each homogenate.

165

166 *Expression data*

167 Expression differences were determined using a published dataset of RNA-seq on 192  
168 inbred sequenced lines from the DGRP [60]. We extracted the expression levels for *Tep3*, *Dro6*  
169 and *Fadd* and used the sequence data from [56] to identify the *Tep3*, *Dro6* and *Fadd* haplotypes.

170

171 **Quantification and Statistical Analysis**

172 *Phenotypic statistical analyses*

173 All statistical analyses were performed using the R software (v 3.2.2; The R core team  
174 2012). Post-infection survival was measured daily and the survival 5 days post infection was  
175 analyzed using a binomial linear regression. The mean proportion of surviving infected flies was  
176 standardized by the survival under sterile wound control treatment and then was evaluated using  
177 the following model:

178

$$179 \text{ Survival / Control survival} = \text{Year*Population*Season} + \text{Line} + \text{Replicate}$$

180

181 Population, year and season were considered as fixed effects and the random effects of replicate  
182 and line were nested within season within population within year.

183

184 The number of colonies is used to calculate the concentration of bacteria in each  
185 homogenate. The concentrations were log transformed and then analyzed using mixed-model  
186 ANOVAs as follows:

187

$$188 \log_{10}(\text{count/mL}) = \text{Year*Population*Season} + \text{Line} + \text{Replicate}$$



189

190 Population, year and season was fixed effects and the random effects were replicate and line  
191 nested within season within population within year. Infector and infection order were initially  
192 included in the model but had no significant effect and were removed.

193

#### 194 *Seasonal SNPs*

195 Seasonal immune SNPs were identified by screening for alleles that fluctuate in  
196 frequency as a function of seasonal time [61] in 88 genes known to have immune function [62].  
197 The seasonal SNPs were cross-referenced with a group of paired spring and fall samples  
198 collected from 10 populations along the North American cline by the *Drosophila* Real Time  
199 Evolution Consortium (Dros-RTEC 12 unpublished samples; [https://sites.sas.upenn.edu/paul-](https://sites.sas.upenn.edu/paul-schmidt-lab/pages/opportunities)  
200 [schmidt-lab/pages/opportunities](https://sites.sas.upenn.edu/paul-schmidt-lab/pages/opportunities)). Additional information was collected on each SNPs including  
201 a clinal q-value [61] and a p-value in a genome wide association study to identify SNPs involved  
202 with *P. rettgeri* pathogenic infection [63]. Enrichment for immune genes was calculated using  
203 customized python scripts that compared proportion of seasonal and non-seasonal immune genes  
204 to control genes that were matched for size and position using  $\chi^2$  with 10,000 bootstrap  
205 iterations.

206 Linkage disequilibrium (LD) among the candidate seasonal immune SNPs was calculated  
207 in the DGRP using allelic correlation of physical distances using the LDheatmap package [64] in  
208 *R*. The 205 sequenced inbred lines of the DGRP were used to examine LD among all of the  
209 candidate SNPs by chromosome [56].

210

#### 211 *Seasonal genotypes*

212 The genotypes from wild populations were determined using a panel of inbred lines  
213 originally collected in Pennsylvania in the spring and autumn of 2012. The lines were inbred by  
214 full-sib mating for 20 generations and subsequently sequenced. Genotype deviation was  
215 calculated as the difference between observed frequency and a predicted frequency based on the  
216 individual alleles. The haplotype distribution of *Tep3* was calculated for SNPs with a minor  
217 allele frequency greater than 0.1 using integer joining networks[65] in PopArt vs. 1.7 [66].

218

#### 219 *Expression data*

220 The expression data for *Tep3*, *Dro6* and *Fadd* was extracted from an RNAseq dataset of  
221 the DGRP [60]. The lines were sorted by genotype based on the published DGRP data [56]  
222 and differences among haplotypes was analyzed using a Welsh t-test in R.

223

## 224 **Results**

### 225 *Geographic differences in immunity*

226 The geographic origin of the *D. melanogaster* population across the latitudinal transect  
227 determined survival post infection but did not predict systemic bacterial load sustained by flies  
228 infected with either pathogen. While survival after *P. rettergi* infection directly depended on the  
229 latitude at which the population was collected ( $\chi^2_{(2)}=12.805$ ,  $p=5.87^{-4}$ ), geographic origin and  
230 season of collection had a combined effect on survival after *E. faecalis* infection ( $\chi^2_{(2)}=10.035$ ,  
231  $p=6.62^{-3}$ ). Survival after *E. faecalis* infection was higher in the lower-latitude Virginia  
232 population in the spring but the clinal difference disappeared in the fall (Figure 1 A-B). The  
233 high-latitude Massachusetts and Pennsylvania populations had similar load and survival after *P.*

234 *rettgeri* infection and exhibited a greater seasonal change in both survival and bacterial load  
235 compared to the lower-latitude Virginia population (Figure 1 C-D).

236

237 *Immunity changes rapidly within a population over seasonal time*

238 Immune defense changed rapidly across approximately 10 generations in the wild from  
239 spring to fall. The relationship between bacterial load and survival varied between source  
240 population and seasonal collection in a pathogen-specific way (Figure 1). Spring populations  
241 were more resistant to *E. faecalis* bacterial growth ( $F_{(1, 219)}=87.758$ ,  $p<0.0001$ ) and maintained  
242 low load with marginally higher survival rates ( $\chi^2_{(1)}=3.201$ ,  $p=0.0736^2$ ), while the fall populations  
243 infected with the same bacteria did not restrict bacterial growth as effectively, resulting in high  
244 load and high mortality (Figure 1 A-B). However, the converse relationship occurred when flies  
245 were infected with *P. rettgeri*: higher survival in the spring ( $\chi^2_{(1)}=16.145$ ,  $p=5.87^{-4}$ ) despite  
246 higher bacterial load ( $F_{(1, 215)}=4.3404$ ,  $p<0.0001$ ) and high mortality in the fall even though the  
247 bacterial growth was restricted to low levels (Figure 1 C-D).

248

249 *SNPs in immune genes oscillate across seasonal time*

250 Immune genes as a functional category were not enriched among genes carrying  
251 polymorphisms that oscillate in frequency over seasonal time in these populations [61] when  
252 compared to controls matched for size and position. We identified 24 candidate SNPs (Table 1)  
253 that oscillate in frequency across seasonal time in these populations [61] located within or in  
254 proximity to 13 genes that are known to be involved in immune function [67]. Candidate  
255 immune genes containing seasonal SNPs were distributed across all levels of the humoral innate  
256 immune pathway: two genes in recognition receptors involved with the detection of pathogens,

257 six genes in the signaling cascades and five effector proteins that contribute directly to bacterial  
258 killing (Table 1).

259

### 260 *Seasonally oscillating Tep3 SNPs have functional differences in immunity*

261 Over 1/3 of the seasonally variable SNPs near immune genes were near *Tep* family  
262 genes, with *Tep* homologs comprising 1/4 of all of the seasonally variable immune genes. *Tep3*  
263 contained numerous seasonally oscillating loci with high LD across the 2.5 kb region in which  
264 the seasonal alleles are located in the DGRP (Figure 2B). There were two primary sequence  
265 haplotypes carrying spring *Tep3<sup>TG</sup>* variants and two sequence haplotypes carrying the fall *Tep3<sup>CT</sup>*  
266 variants in the Pennsylvania orchard (Figure 3F, Table S2). We tested the function of these SNPs  
267 using recombinant outbred populations with two loci as markers: the non-synonymous coding  
268 change at *2L:7703202* that is surrounded by five intronic seasonal SNPs and the intronic SNP  
269 *2L:7705370* that is 2 kb downstream from the cluster (*D. melanogaster* reference genome  
270 v.5.39). Alleles of the intronic SNP at *2L: 7703202* were non-randomly distributed with respect  
271 to karyotype: in both of the independent DGRP and Pennsylvania populations, we observed that  
272 the fall allele (C) was strongly associated with *In(2L)t*. In contrast, the spring allele (T) occurred  
273 mostly in a standard arrangement genetic background (Fisher's exact test;  $p < 0.0001$ ).  
274 *2L:7705730* had no significant association with either arrangement of *In(2L)t* (Fisher's exact test;  
275  $p = 0.161$ ).

276 There was no difference among the *Tep3* recombinant outbred populations in bacterial  
277 load, but there was differential survivorship after infection with both Gram-positive and Gram-  
278 negative pathogens. Flies containing the spring *Tep3<sup>TG</sup>* haplotype had higher survival than those  
279 containing the fall *Tep3<sup>CT</sup>* or mixed *Tep3<sup>CG</sup>* haplotypes when infected with Gram-positive *E.*

280 *faecalis* ( $\chi^2_{(2)}=6.73$ ,  $p=0.0346$ ; Figure 3A). The *Tep3* SNPs are associated with an additive effect  
281 on survival of Gram-negative *P. rettgeri* infection with higher survival in flies containing the fall  
282 haplotype than those containing the spring haplotype and intermediate survival in flies  
283 containing the mixed haplotype ( $\chi^2_{(2)}=3.651$ ,  $p=0.161$ , Figure 3B). Flies containing the seasonal  
284 *Tep3* haplotypes have no difference in *Tep3* expression in the absence of infection ( $F_{(3, 360)}=$   
285 1.419  $p=0.239$ , Figure 3C) based on previously published RNAseq expression of the DGRP  
286 lines [60].

287

### 288 *Epistasis among AMP genes involved in rapid seasonal adaptation*

289 We tested whether additional seasonal SNPs in the immune pathways interact with *Tep3*  
290 to facilitate rapid immune evolution across seasons. We examined epistatic interactions in  
291 immune function between *Tep3* and a seasonally cycling immune SNP (*3L:3334769*, an  
292 upstream modifier of *Drosomycin-like 6 (Dro6)*), that was shown to significantly affect  
293 resistance to *P. rettgeri* in a genome-wide association study [63]. We also tested epistasis among  
294 the *Tep3* SNPs and *3R:17861050*, a 3' UTR modifier in the signaling gene *Fas-associated death*  
295 *domain ortholog (Fadd)*, also known as *BG4*), which was the only SNP that demonstrated  
296 concordant patterns between seasonal change and latitudinal differentiation (Figure 2A, Table 1).  
297 There was no difference in immune defense among recombinant populations containing  
298 combinations of *Tep3* and *Fadd*, but the non-additive interactions among recombinant  
299 populations containing *Tep3* and *Dro6* alleles begin to explain more of the complexity of  
300 immune defense of natural populations (Figure 4A-D).

301

302

303 **Discussion**

304 *Natural populations differ in immunity over geographic space and across seasonal time*

305 We show that immune response differs among populations across space and time. Season  
306 of collection is a strong predictor of the immune response across the geographic locations that  
307 span 4° latitude with a seasonal decline in resistance to *E. faecalis* and a seasonal decline in  
308 tolerance of *P. rettgeri* infection. The change in immunity across seasonal time occurs rapidly  
309 within each geographic location with approximately 10 generations between the spring and fall  
310 collections. The repeated seasonal change in immune defense is consistent with previous  
311 findings for other measurements of stress resistance [38,39]. Together this suggests that the harsh  
312 winter selects for a suite of traits that produce a robust spring population and that selection on  
313 those traits is relaxed during the summer producing a less stress resistant population in the fall.

314 Although the strongest differentiation of immunity occurred across seasonal time, there  
315 was also a signal of geography along the sampled spatial gradient. Our results contrast with  
316 previous studies that did not detect a robust association between latitude and survival [68] or  
317 load [36,62]. The difference may be attributed to the interaction between season and latitude. It is  
318 possible that geographical differences in immune response may be even greater across a longer  
319 distance that may capture a larger difference in pathogen diversity [42-49].

320 The repeatability of the change in immune defense across replicate years and locations  
321 indicate deterministic evolutionary processes. Rearing the lines for multiple generations in a  
322 common laboratory environment that is distinct from the external sample sites removes  
323 environmental variation and ensures that differences among collections and populations can be  
324 attributed to genetic diversity among the source populations. It is possible that gene flow due to  
325 migration from other latitudes contributes to the differences between the spring and fall

326 populations. However, migration is unlikely to be the primary cause underlying seasonal immune  
327 differences because the latitudinal differentiation was weak compared to seasonal change.  
328 Furthermore, infection with different pathogens resulted in opposing clinal patterns but parallel  
329 change across seasons. Additionally, migration alone appears insufficient to explain genome-  
330 wide differences in allele frequency profiles that characterize spring and fall populations in  
331 Pennsylvania orchard [61]; thus, migration is unlikely to explain the seasonal differences in  
332 immune response. Wild *Drosophila* populations live in a heterogeneous environment and evolve  
333 rapidly in response to environmental parameters that change with season [38,39], potentially  
334 including rapid turn-over in microbial and pathogen communities (Figure S2).

335

### 336 *SNPs in immune genes oscillate across seasonal time*

337 The changes in immune defense are due to differences in genes with immune function  
338 across space and time. Genomic screens show that immune genes are enriched across latitudinal  
339 gradients [32-35], but we did not find enrichment among immune genes in SNPs that cycle in  
340 frequency with season. Seasonal differences in immunity could arise from variation in genes that  
341 are not classically identified as part of the immune system and were not detected from our  
342 screen. However, the *D. melanogaster* immune system is well characterized and changes in even  
343 a single immune gene could affect the phenotypic response to infection even without enrichment  
344 for all immune genes. Alternatively, the immune changes may be controlled by non-additive  
345 genetic interactions that would not be identified in the enrichment analysis.

346

### 347 *Immune survival of flies containing seasonally oscillating *Tep3* haplotypes*

348           The patterns in the recombinant outbred populations were consistent with the seasonal  
349 patterns in natural populations: spring populations and flies containing the spring *Tep3* haplotype  
350 both had a higher defense against Gram-positive *E. faecalis* whereas fall populations and flies  
351 containing the fall *Tep3* haplotype had higher defense against Gram-negative *P. rettgeri*.  
352 Opposite survival patterns for flies with spring and fall *Tep3* haplotypes were consistent with  
353 antagonistic pleiotropy [69] within the branches of the immune system limiting the host such that  
354 improvements in response to one class of pathogens (e.g., Gram-negative bacteria) restrict the  
355 ability to respond to other pathogens (e.g., Gram-positive bacteria). Trade-offs within the  
356 immune system occur in several insect systems between humoral antimicrobial peptides that  
357 combat microbial infections and phenoloxidase that is deployed against eukaryotic parasites  
358 [14,70,71] as well as in the T helper cells of the vertebrate immune system (reviewed in [72]).  
359 We hypothesize that genetic variation for allocation of either immune activity may be maintained  
360 if the risk of pathogenesis changes over space or time. The genotypes have pathogenic-specific  
361 genetic effects. Additivity among the loci in response to *P. rettgeri*, but a non-additive response  
362 to *E. faecalis*, suggests that the fall allele at *2L:7705370*, or genetic variants linked to it, has a  
363 dominant effect that decreases survival to *E. faecalis* infection.

364           Our data suggest that these *Tep3* loci are natural variants in immune tolerance because  
365 flies containing the haplotypes with the same infection load had differential survivorship. The  
366 molecular function of the seasonal loci in *Tep3* remains unclear. *Tep* proteins are  $\alpha$ -  
367 macroglobulin protease traps that bind to pathogen surface and act as opsonins [73-75]. The  
368 polymorphism at *2L:7703202* produces a nonsynonymous Ala/Val polymorphism at residue 18,  
369 but both amino acids produced are hydrophobic. The intronic SNP at *2L:7705370* is directly  
370 upstream of the exon cassette region and may regulate expression, but *Tep3* is constitutively



371 expressed and not strongly induced by *E. faecalis* or *P. rettgeri* infection [76]; B.P. Lazzaro  
372 unpublished data). Therefore, the SNPs we examined may most appropriately be considered as  
373 markers for a larger haplotype that contains the causal variants.

374 Pathogen-specific higher survival associated with the spring and fall *Tep3* haplotypes  
375 may increase their frequency in the wild compared to flies containing a combination of spring  
376 and fall alleles. Inversions could theoretically maintain the LD that preserves the high-fitness  
377 spring and fall haplotypes [77,78], but this is unlikely because the *In(2L)t* inversion that contains  
378 *Tep3* does not cycle with season [61,79]. Additionally, *Tep3* is not located near a recombination-  
379 limiting breakpoint of *In(2L)t* nor is it in LD with other seasonal immune SNPs within the  
380 inversion. However, we found that in two independent populations alleles of the intronic SNP at  
381 *2L: 7703202* were non-randomly distributed with respect to karyotype while *2L:7705730* had no  
382 significant association with either arrangement of *In(2L)t*. LD might be created and maintained  
383 by selection against recombinant phenotypes either due to lower immunocompetence or another  
384 pleiotropic trait or because of intraspecific genetic incompatibilities. Deleterious  
385 incompatibilities maintain distinct haplotypes in *Arabidopsis thaliana* NLR immune receptors  
386 [80] and may also explain the near absence of the *Tep3*<sup>CG</sup> combination of spring and fall alleles  
387 in all populations examined. Flies containing the *Tep3*<sup>CG</sup> haplotype appear three times across the  
388 haplotype tree constructed from the seasonal Pennsylvania inbred lines, suggesting that the  
389 haplotype may form occasionally through recombination but does not proliferate in the  
390 population. Thus, it is likely that selection for the immune benefits of the spring and fall  
391 haplotypes and against the combination of spring and fall alleles maintains these distinct  
392 haplotypes in the wild. While these *Tep3* haplotypes explained some of the seasonal differences

393 in immune tolerance of natural populations, other seasonally changing genes may also contribute  
394 to the observed differences in bacterial resistance in natural populations

395

### 396 *Epistasis among AMP genes involved in rapid seasonal adaptation*

397 Intergenic epistatic interactions between *Tep3* and *Dro6* suggest that season-specific  
398 genotypes have highest fitness. In our experiment, flies having all spring or all fall alleles had  
399 higher survival after infection while flies that contained a combination of spring and fall had  
400 higher mortality. This suggests that complex genetic interactions shape winter and summer  
401 fitness with distinct haplotypes maintained by non-additive epistatic interactions [81-83].

402

### 403 *Conclusions*

404 With this work, we demonstrate that pathogen-specific innate immunity evolves rapidly  
405 in natural populations of *D. melanogaster* across replicate years and geographic locations.  
406 Comparative studies across species and among populations have indicated that immune genes  
407 evolve faster than other genes in the genome, but the rapid phenotypic and genetic change we  
408 observed over approximately 10 generations is a substantially faster rate than previously  
409 considered. We tested a small subset of the immune SNPs that oscillate in allele frequency over  
410 seasonal time and observed intra- and inter-genic interactions consistent with changes in immune  
411 tolerance and resistance across seasons in natural populations, perhaps in response to seasonally  
412 changing bacterial communities. Epistatic interactions among seasonally oscillating immune  
413 alleles may help facilitate this rapid phenotypic change over a short seasonal timescale. This  
414 rapid, cyclic response to biotic variables broadens our understanding of the complex ecological  
415 and genetic interactions in the evolutionary dynamics of natural populations.

416

417 **Author Contributions**

418 ELB, VMH, BPL & PSS designed the project. ELB & PSS collected the wild samples and ELB  
419 & VMH performed the infections. FS analyzed the microbial communities and AOB and DAP  
420 inbred and sequenced the seasonal lines used for genotypes in natural populations. ELB, MK and  
421 PSS did the data analyses. ELB, VMH, MK, FS, AOB, DAP, BPL and PSS wrote the paper.

422

423 **Acknowledgments**

424 This work was supported by NSF GRF DGE-0822 (ELB), the Rosemary Grant Award from the  
425 Society for the Study of Evolution (ELB), the Peachey Environmental Fund (ELB), NSF DEB  
426 0921307 (PSS) and NIH R01GM100366 (PSS & DAP).

427

428

429

430 **References**

431

- 432 1. Darwin, C. 1859 *On the Origin of Species by Means of Natural Selection, or, the*  
433 *Preservation of Favoured Races in the Struggle for Life*. London: J Murray.
- 434 2. Grant, P. R. & Grant, B. R. 2002 Unpredictable Evolution in a 30-Year Study of Darwin's  
435 Finches. *Science* **296**, 707–711. (doi:10.1126/science.1070315)
- 436 3. Thompson, J. N. 1998 Rapid evolution as an ecological process. *Trends Ecol Evol* **13**,  
437 329–332. (doi:10.1016/S0169-5347(98)01378-0)
- 438 4. Thompson, J. N. 2013 *Relentless Evolution*. Chicago: Chicago University Press.
- 439 5. Carroll, S. P., Hendry, A. P., Reznick, D. N. & Fox, C. W. 2007 Evolution on ecological  
440 time-scales. *Funct Ecol* **21**, 387–393. (doi:10.1111/j.1365-2435.2007.01289.x)
- 441 6. Messer, P. W., Ellner, S. P. & Hairston, N. G., Jr. 2016 Can Population Genetics Adapt to  
442 Rapid Evolution? *Trends in Genetics* (doi:10.1016/j.tig.2016.04.005)
- 443 7. Endler, J. A. 1977 *Geographic Variation, Speciation, and Clines*. Princeton University  
444 Press.
- 445 8. Sheldon, B. C. & Verhulst, S. 1996 Ecological immunology: costly parasite defenses and  
446 trade-offs in evolutionary ecology. *Trends Ecol Evol* **11**, 317–321. (doi:10.1016/0169-  
447 5347(96)10039-2)
- 448 9. Kraaijeveld, A. R. & Godfray, H. C. J. 1997 Trade-off between parasitoid resistance and  
449 larval competitive ability in *Drosophila melanogaster*. *Nature* **389**, 278–280.  
450 (doi:10.1038/38483)
- 451 10. Lochmiller, R. L. & Deerenberg, C. 2000 Trade-offs in evolutionary immunology: just  
452 what is the cost of immunity? *Oikos* **88**, 87–98.
- 453 11. Schmid-Hempel, P. 2003 Variation in immune defense as a question of evolutionary  
454 ecology. *Proc. R. Soc. B* **270**, 357–366. (doi:10.1098/rspb.2002.2265)
- 455 12. Festa-Bianchet, M. 1989 Individual Differences, Parasites, and the Costs of Reproduction  
456 for Bighorn Ewes (*Ovis canadensis*). *J Anim Ecol* **58**, 785. (doi:10.2307/5124)
- 457 13. Moret, Y. & Schmid-Hempel, P. 2000 Survival for immunity: the price of immune system  
458 activation for bumblebee workers. *Science* **290**, 1166–1168.  
459 (doi:10.1126/science.290.5494.1166)
- 460 14. Moret, Y. & Schmid-Hempel, P. 2001 Entomology: immune defence in bumble-bee  
461 offspring. *Nature* (doi:10.1038/35107138)
- 462 15. Verhulst, S., Riedstra, B. & Wiersma, P. 2005 Brood size and immunity costs in zebra

- 463 finches *Taeniopygia guttata*. *Journal of Avian Biology* **36**, 22–30. (doi:10.1111/j.0908-  
464 8857.2005.03342.x)
- 465 16. Ferdig, M. T., Beerntsen, B. T., Spray, F. J., Li, J. & Christensen, B. M. 1993  
466 Reproductive costs associated with resistance in a mosquito-filarial worm system. *Am J*  
467 *Trop Med Hyg* **49**, 756–762.
- 468 17. Lacoste, A., Malham, S. K., Gélébart, F., Cueff, A. & Poulet, S. A. 2002 Stress-induced  
469 immune changes in the oyster *Crassostrea gigas*. *Dev Comp Immunol* **26**, 1–9.  
470 (doi:10.1016/S0145-305X(01)00067-2)
- 471 18. Ilmonen, P., Taarna, T. & Hasselquist, D. 2000 Experimentally activated immune defence  
472 in female pied flycatchers results in reduced breeding success. *Proc. R. Soc. B* **267**, 665–  
473 670. (doi:10.1098/rspb.2000.1053)
- 474 19. Svensson, E., Råberg, L., Koch, C. & Hasselquist, D. 1998 Energetic stress,  
475 immunosuppression and the costs of an antibody response. *Funct Ecol* **12**, 912–919.
- 476 20. Zuk, M. & Stoehr, A. M. 2002 Immune Defense and Host Life History. *Am Nat* **160**, S9–  
477 S22. (doi:10.1086/342131)
- 478 21. Kraaijeveld, A. R. & Wertheim, B. 2009 Costs and genomic aspects of *Drosophila*  
479 immunity to parasites and pathogens. In *Insect Infection and Immunity*, pp. 187–205.  
480 Insect Infection and Immunity Oxford ....
- 481 22. Daukste, J., Kivleniece, I., Krama, T., Rantala, M. J. & Krams, I. 2012 Senescence in  
482 immune priming and attractiveness in a beetle. *J Evolution Biol* **25**, 1298–1304.  
483 (doi:10.1111/j.1420-9101.2012.02516.x)
- 484 23. Otti, O., Gantenbein Ritter, I., Jacot, A. & Brinkhof, M. W. G. 2012 Immune response  
485 increases predation risk. *Evolution* **66**, 732–739. (doi:10.1111/j.1558-5646.2011.01506.x)
- 486 24. Fumagalli, M., Sironi, M., Pozzoli, U., Ferrer-Admettla, A., Pattini, L. & Nielsen, R. 2011  
487 Signatures of Environmental Genetic Adaptation Pinpoint Pathogens as the Main  
488 Selective Pressure through Human Evolution. *PLOS Genet* **7**, e1002355.  
489 (doi:10.1371/journal.pgen.1002355)
- 490 25. Daub, J. T., Hofer, T., Cutivet, E., Dupanloup, I., Quintana-Murci, L., Robinson-Rechavi,  
491 M. & Excoffier, L. 2013 Evidence for Polygenic Adaptation to Pathogens in the Human  
492 Genome. *Mol Biol Evol* **30**, mst080–1558. (doi:10.1093/molbev/mst080)
- 493 26. Quintana-Murci, L. & Clark, A. G. 2013 Population genetic tools for dissecting innate  
494 immunity in humans. *Nat Rev Immunol* **13**, 280–293. (doi:10.1038/nri3421)
- 495 27. McTaggart, S. J., Obbard, D. J., Conlon, C. & Little, T. J. 2012 Immune genes undergo  
496 more adaptive evolution than non-immune system genes in *Daphnia pulex*. *BMC Evol*  
497 *Biol* **12**, 63. (doi:10.1186/1471-2148-12-63)

- 498 28. Waterhouse, R. M. et al. 2007 Evolutionary Dynamics of Immune-Related Genes and  
499 Pathways in Disease-Vector Mosquitoes. *Science* **316**, 1738–1743.  
500 (doi:10.1126/science.1139862)
- 501 29. Crawford, J. E., Guelbeogo, W. M., Sanou, A., Traoré, A., Vernick, K. D., Sagnon, N. &  
502 Lazzaro, B. P. 2010 De Novo Transcriptome Sequencing in *Anopheles funestus* Using  
503 Illumina RNA-Seq Technology. *PLoS ONE* **5**, e14202.  
504 (doi:10.1371/journal.pone.0014202)
- 505 30. Erler, S., Lhomme, P., Rasmont, P. & Lattorff, H. M. G. 2014 Rapid evolution of  
506 antimicrobial peptide genes in an insect host–social parasite system. *Infect Genet Evol* **23**,  
507 129–137. (doi:10.1016/j.meegid.2014.02.002)
- 508 31. Chávez Galarza, J., Henriques, D., Johnston, J. S., Azevedo, J. C., Patton, J. C., Muñoz, I.,  
509 la Rúa, De, P. & Pinto, M. A. 2013 Signatures of selection in the Iberian honey bee (*Apis*  
510 *mellifera iberiensis*) revealed by a genome scan analysis of single nucleotide  
511 polymorphisms. *Mol. Ecol.* **22**, 5890–5907. (doi:10.1111/mec.12537)
- 512 32. Juneja, P. & Lazzaro, B. P. 2010 Haplotype Structure and Expression Divergence at the  
513 *Drosophila* Cellular Immune Gene eater. *Mol Biol Evol* **27**, 2284–2299.  
514 (doi:10.1093/molbev/msq114)
- 515 33. Fabian, D. K., Kapun, M., Nolte, V., Kofler, R., Schmidt, P. S., Schlötterer, C. & Flatt, T.  
516 2012 Genome-wide patterns of latitudinal differentiation among populations of  
517 *Drosophila melanogaster* from North America. *Mol. Ecol.* **21**, 4748–4769.  
518 (doi:10.1111/j.1365-294X.2012.05731.x)
- 519 34. Hübner, S., Rashkovetsky, E., Kim, Y. B., Oh, J. H., Michalak, K., Weiner, D., Korol, A.  
520 B., Nevo, E. & Michalak, P. 2013 Genome differentiation of *Drosophila melanogaster*  
521 from a microclimate contrast in Evolution Canyon, Israel. *PNAS* **110**, 21059–21064.  
522 (doi:10.1073/pnas.1321533111)
- 523 35. Kolaczowski, B., Kern, A. D., Holloway, A. K. & Begun, D. J. 2011 Genomic  
524 differentiation between temperate and tropical Australian populations of *Drosophila*  
525 *melanogaster*. *Genetics* **187**, 245–260. (doi:10.1534/genetics.110.123059)
- 526 36. Lazzaro, B. P., Flores, H. A., Lorigan, J. G. & Yourth, C. P. 2008 Genotype-by-  
527 environment interactions and adaptation to local temperature affect immunity and  
528 fecundity in *Drosophila melanogaster*. *PLoS Pathogens* **4**.  
529 (doi:10.1371/journal.ppat.1000025)
- 530 37. Corby-Harris, V. & Promislow, D. E. 2008 Host ecology shapes geographical variation  
531 for resistance to bacterial infection in *Drosophila melanogaster*. *J Anim Ecol* **77**, 768–776.  
532 (doi:10.1111/j.1365-2656.2008.01399.x)
- 533 38. Schmidt, P. S. & Conde, D. R. 2006 Environmental heterogeneity and the maintenance of  
534 genetic variation for reproductive diapause in *Drosophila melanogaster*. *Evolution* **60**,  
535 1602–1611. (doi:10.1111/j.0014-3820.2006.tb00505.x)

- 536 39. Behrman, E. L., Watson, S. S., O'Brien, K. R., Heschel, M. S. & Schmidt, P. S. 2015  
537 Seasonal variation in life history traits in two *Drosophila* species. *J Evolution Biol* **28**,  
538 1691–1704. (doi:10.1111/jeb.12690)
- 539 40. Cogni, R., Kuczynski, C., Koury, S., Lavington, E., Behrman, E. L., O'Brien, K. R.,  
540 Schmidt, P. S. & Eanes, W. F. 2013 The Intensity of Selection Acting on the Couch Potato  
541 Gene-Spatial-Temporal Variation in a Diapause Cline. *Evolution* **68**, 538–548.
- 542 41. Bergland, A. O., Behrman, E. L., O'Brien, K. R., SCHMIDT, P. S. & Petrov, D. A. 2014  
543 Genomic Evidence of Rapid and Stable Adaptive Oscillations over Seasonal Time Scales  
544 in *Drosophila*. *PLoS Genet* **10**, e1004775–19. (doi:10.1371/journal.pgen.1004775)
- 545 42. Tinsley, M. C., Blanford, S. & Jiggins, F. M. 2006 Genetic variation in *Drosophila*  
546 *melanogaster* pathogen susceptibility. *Parasitology*
- 547 43. P Møller, A., Martín Vivaldi, M., Merino, S. & J Soler, J. 2006 Density-dependent and  
548 geographical variation in bird immune response. *Oikos* **115**, 463–474.  
549 (doi:10.1111/j.2006.0030-1299.15312.x)
- 550 44. Møller, A. P. & Moller, A. P. 1998 Evidence of Larger Impact of Parasites on Hosts in the  
551 Tropics: Investment in Immune Function within and outside the Tropics. *Oikos* **82**, 265.  
552 (doi:10.2307/3546966)
- 553 45. Papparazzo, F., Tellier, A., Stephan, W. & Hutter, S. 2015 Survival Rate and  
554 Transcriptional Response upon Infection with the Generalist Parasite *Beauveria bassiana*  
555 in a World-Wide Sample of *Drosophila melanogaster*. *PLoS ONE* **10**, e0132129.  
556 (doi:10.1371/journal.pone.0132129)
- 557 46. Guernier, V., Hochberg, M. E. & Guégan, J.-F. 2004 Ecology Drives the Worldwide  
558 Distribution of Human Diseases. *PLOS Biol* **2**, e141. (doi:10.1371/journal.pbio.0020141)
- 559 47. Schemske, D. W., Mittelbach, G. G., Cornell, H. V., Sobel, J. M. & Roy, K. 2009 Is There  
560 a Latitudinal Gradient in the Importance of Biotic Interactions? *Annu Rev Ecol Evol Syst*  
561 (doi:10.1146/annurev.ecolsys.39.110707.173430)
- 562 48. Nunn, C. L., Altizer, S. M., Sechrest, W. & Cunningham, A. A. 2005 Latitudinal gradients  
563 of parasite species richness in primates. *Diversity Distrib* **11**, 249–256.  
564 (doi:10.1111/j.1366-9516.2005.00160.x)
- 565 49. Dionne, M., Miller, K. M., Dodson, J. J., Caron, F. & Bernatchez, L. 2007 Clinal variation  
566 in MHC diversity with temperature: evidence for the role of host-pathogen interaction on  
567 local adaptation in atlantic salmon. *Evolution* **61**, 2154–2164. (doi:10.1111/j.1558-  
568 5646.2007.00178.x)
- 569 50. Gilbert, J. A., Field, D., Swift, P., Newbold, L., Oliver, A., Smyth, T., Somerfield, P. J.,  
570 Huse, S. & Joint, I. 2009 The seasonal structure of microbial communities in the Western  
571 English Channel. *Environmental Microbiology* **11**, 3132–3139. (doi:10.1111/j.1462-  
572 2920.2009.02017.x)



- 573 51. Runckel, C., Flenniken, M. L., Engel, J. C., Ruby, J. G., Ganem, D., Andino, R. & DeRisi,  
574 J. L. 2011 Temporal Analysis of the Honey Bee Microbiome Reveals Four Novel Viruses  
575 and Seasonal Prevalence of Known Viruses, Nosema, and Crithidia. *PLoS ONE* **6**,  
576 e20656. (doi:10.1371/journal.pone.0020656)
- 577 52. Maurice, C. F., Knowles, S. C., Ladau, J., Pollard, K. S., Fenton, A., Pedersen, A. B. &  
578 Turnbaugh, P. J. 2015 Marked seasonal variation in the wild mouse gut microbiota. *ISME*  
579 *J* **9**, 2423–2434. (doi:10.1038/ismej.2015.53)
- 580 53. Smits, S. A. et al. 2017 Seasonal cycling in the gut microbiome of the Hadza hunter-  
581 gatherers of Tanzania. *Science*, 802–806.
- 582 54. Hoffmann, J. A. & Reichhart, J.-M. 2002 *Drosophila* innate immunity: an evolutionary  
583 perspective. *Nat Immunol* **3**, 121–126. (doi:10.1038/ni0202-121)
- 584 55. Paaby, A. B., Bergland, A. O., Behrman, E. L. & Schmidt, P. S. 2014 A highly pleiotropic  
585 amino acid polymorphism in the *Drosophila* insulin receptor contributes to life-history  
586 adaptation. *Evolution* **68**, 3395–3409. (doi:10.1111/evo.12546)
- 587 56. Mackay, T. F. C. et al. 2012 The *Drosophila melanogaster* Genetic Reference Panel.  
588 *Nature* **482**, 173–178. (doi:10.1038/nature10811)
- 589 57. Khalil, S., Jacobson, E., Chambers, M. C. & Lazzaro, B. P. 2015 Systemic bacterial  
590 infection and immune defense phenotypes in *Drosophila melanogaster*. *JOVE-J Vis Exp*,  
591 e52613–e52613. (doi:10.3791/52613)
- 592 58. Juneja, P. & Lazzaro, B. P. 2009 *Providencia sneebia* sp. nov. and *Providencia*  
593 *burhodogranariea* sp. nov., isolated from wild *Drosophila melanogaster*. *Int J Syst Evol*  
594 *Micr* **59**, 1108–1111. (doi:10.1099/ijs.0.000117-0)
- 595 59. Lazzaro, B. P., Sackton, T. B. & Clark, A. G. 2006 Genetic Variation in *Drosophila*  
596 *melanogaster* Resistance to Infection: A Comparison Across Bacteria. *Genetics* **174**,  
597 1539–1554. (doi:10.1534/genetics.105.054593)
- 598 60. Huang, W., Carbone, M. A., Magwire, M. M., Peiffer, J. A., Lyman, R. F., Stone, E. A.,  
599 Anholt, R. R. H. & Mackay, T. F. C. 2015 Genetic basis of transcriptome diversity in  
600 *Drosophila melanogaster*. *PNAS* **112**, E6010–E6019. (doi:10.1073/pnas.1519159112)
- 601 61. Bergland, A. O., Behrman, E. L., O'Brien, K. R., Schmidt, P. S. & Petrov, D. A. 2014  
602 Genomic Evidence of Rapid and Stable Adaptive Oscillations over Seasonal Time Scales  
603 in *Drosophila*. *PLOS Genet* **10**, e1004775. (doi:10.1371/journal.pgen.1004775)
- 604 62. Early, A. M. & Clark, A. G. 2013 Monophyly of *Wolbachia pipientis* genomes within  
605 *Drosophila melanogaster*: geographic structuring, titre variation and host effects across  
606 five populations. *Mol. Ecol.* **22**, 5765–5778. (doi:10.1111/mec.12530)
- 607 63. Unckless, R. L., Rottschaefer, S. M. & Lazzaro, B. P. 2015 The Complex Contributions of  
608 Genetics and Nutrition to Immunity in *Drosophila melanogaster*. *PLOS Genet* **11**,



- 609 e1005030. (doi:10.1371/journal.pgen.1005030)
- 610 64. Shin, J. H., Blay, S., McNeney, B. & Graham, J. 2006 LDheatmap: an R function for  
611 graphical display of pairwise linkage disequilibria between single nucleotide  
612 polymorphisms. *Journal of Statistical ...* (doi:10.18637/jss.v016.c03)
- 613 65. Sheppard, S. K. & Meric, G. 2014 *Campylobacter Ecology and Evolution*.
- 614 66. Leigh, J., Bryant, D. & Steel, M. 2015 *PopART (Population Analysis with Reticulate*  
615 *Trees)*.
- 616 67. Early, A. M., Arguello, J. R., Cardoso-Moreira, M., Gottipati, S., Grenier, J. K. & Clark,  
617 A. G. 2016 Survey of Global Genetic Diversity Within the *Drosophila* Immune System.  
618 *Genetics*, genetics.116.195016. (doi:10.1534/genetics.116.195016)
- 619 68. Corby-Harris, V., Pontaroli, A. C., Shimkets, L. J., Bennetzen, J. L., Habel, K. E. &  
620 Promislow, D. E. 2007 Geographical distribution and diversity of bacteria associated with  
621 natural populations of *Drosophila melanogaster*. *Appl. Environ. Microbiol.* **73**, 3470–  
622 3479. (doi:10.1128/AEM.02120-06)
- 623 69. Williams, G. C. 1957 Pleiotropy, Natural-Selection, and the Evolution of Senescence.  
624 *Evolution* **11**, 398–411.
- 625 70. Wilfert, L., Gadau, J. & Schmid-Hempel, P. 2007 The Genetic Architecture of Immune  
626 Defense and Reproduction in Male *Bombus terrestris* Bumblebees. *Evolution* **61**, 804–  
627 815. (doi:10.1111/j.1558-5646.2007.00079.x)
- 628 71. Freitak, D., Wheat, C. W., Heckel, D. G. & Vogel, H. 2007 Immune system responses and  
629 fitness costs associated with consumption of bacteria in larvae of *Trichoplusia ni*. *BMC*  
630 *Biology* 2007 5:1 **5**, 56. (doi:10.1186/1741-7007-5-56)
- 631 72. Fenton, A., Lamb, T. & Graham, A. L. 2008 Optimality analysis of Th1/Th2 immune  
632 responses during microparasite-macroparasite co-infection, with epidemiological  
633 feedbacks. *Parasitology* **135**, 841–853. (doi:10.1017/S0031182008000310)
- 634 73. Blandin, S. 2004 Thioester-containing proteins and insect immunity. *Mol Immunol* **40**,  
635 903–908. (doi:10.1016/j.molimm.2003.10.010)
- 636 74. Shokal, U., Kopydlowski, H. & Eleftherianos, I. 2017 The distinct function of Tep2 and  
637 Tep6 in the immune defense of *Drosophila melanogaster* against the pathogen  
638 *Photorhabdus*. *Virulence* **265**, 1–15. (doi:10.1080/21505594.2017.1330240)
- 639 75. Shokal, U. & Eleftherianos, I. 2017 Thioester-Containing Protein-4 Regulates the  
640 *Drosophila* Immune Signaling and Function against the Pathogen *Photorhabdus*. *J Innate*  
641 *Immun* **9**, 83–93. (doi:10.1159/000450610)
- 642 76. Lagueux, M., Perrodou, E., Levashina, E. A., Capovilla, M. & Hoffmann, J. A. 2000  
643 Constitutive expression of a complement-like protein in Toll and JAK gain-of-function

- 644 mutants of *Drosophila*. *PNAS* **97**, 11427–11432. (doi:10.1073/pnas.97.21.11427)
- 645 77. Kunte, K., Zhang, W., Tenger-Trolander, A., Palmer, D. H., Martin, A., Reed, R. D.,  
646 Mullen, S. P. & Kronforst, M. R. 2014 doublesex is a mimicry supergene. *Nature* **507**,  
647 229–232. (doi:10.1038/nature13112)
- 648 78. Nishikawa, H. et al. 2015 A genetic mechanism for female-limited Batesian mimicry in  
649 *Papilio* butterfly. *Nat Genet* **47**, 405–409. (doi:10.1038/ng.3241)
- 650 79. Kapun, M., Fabian, D. K., Goudet, J. & Flatt, T. 2016 Genomic Evidence for Adaptive  
651 Inversion Clines in *Drosophila melanogaster*. *Mol Biol Evol*, msw016.  
652 (doi:10.1093/molbev/msw016)
- 653 80. Chae, E. et al. 2014 Species-wide Genetic Incompatibility Analysis Identifies Immune  
654 Genes as Hot Spots of Deleterious Epistasis. *Cell* **159**, 1341–1351.  
655 (doi:10.1016/j.cell.2014.10.049)
- 656 81. Natarajan, C., Inoguchi, N., Weber, R. E., Fago, A., Moriyama, H. & Storz, J. F. 2013  
657 Epistasis Among Adaptive Mutations in Deer Mouse Hemoglobin. *Science* **340**, 1324–  
658 1327. (doi:10.1126/science.1236862)
- 659 82. Tufts, D. M., Natarajan, C., Revsbech, I. G., Projecto-Garcia, J., Hoffmann, F. G., Weber,  
660 R. E., Fago, A., Moriyama, H. & Storz, J. F. 2014 Epistasis Constrains Mutational  
661 Pathways of Hemoglobin Adaptation in High-Altitude Pikas. *Mol Biol Evol*, msu311.  
662 (doi:10.1093/molbev/msu311)
- 663 83. Hanifin, C. T. & Gilly, W. F. 2015 Evolutionary history of a complex adaptation:  
664 tetrodotoxin resistance in salamanders. *Evolution* (doi:10.1111/evo.12552/pdf)
- 665 84. Staubach, F., Baines, J. F., Künzel, S., Bik, E. M. & Petrov, D. A. 2013 Host Species and  
666 Environmental Effects on Bacterial Communities Associated with *Drosophila* in the  
667 Laboratory and in the Natural Environment. *PLoS ONE* **8**, e70749.  
668 (doi:10.1371/journal.pone.0070749)
- 669 85. Schloss, P. D. et al. 2009 Introducing mothur: open-source, platform-independent,  
670 community-supported software for describing and comparing microbial communities.  
671 *Appl. Environ. Microbiol.* **75**, 7537–7541. (doi:10.1128/AEM.01541-09)

672

673

674

675 **Figure Legends**

676

677 Figure 1. Immune defense relationship between bacterial load and survival in natural spring and  
678 fall populations. Isofemale lines (small, outline) were used to calculate population mean (large,  
679 filled) from natural orchard populations collected along a latitudinal gradient in Massachusetts  
680 (circle) Pennsylvania (triangle) and Virginia (square) in the spring (blue) and fall (red) for two  
681 replicate years: 2012 (A & C) and 2014 (B & D). Immune defense was probed with two natural  
682 pathogens: a gram-positive bacterium *Enterococcus faecalis* (A&B) and a gram-negative  
683 bacterium *Providencia rettgeri* (C&D). Twenty isofemale lines from each collection were  
684 measured for 5-day survival after infection and bacterial load at 24 hours post-infection scaled by  
685 average load for the experiment.

686

687 Figure 2. Seasonal changes in immune genes in natural populations. (A) Manhattan plot of SNPs  
688 in immune genes that change in frequency as a function of seasonal time with a zoom in on  
689 *Tep3*. The red line indicates the seasonal q-value cutoff  $>0.3[61]$  and all immune genes that have  
690 significant SNPs are labeled by name on the x-axis. The SNPs on which functional analyses were  
691 performed are highlighted: *Fadd* (pink square), *Dro6* (yellow circle), *2L:7703202* (upwards cyan  
692 triangle) and *2L:7705370* (downwards blue triangle). (B) Heat map showing linkage  
693 disequilibrium (LD) among SNPs in immune response genes across each chromosome. Linkage  
694 disequilibrium calculated as allelic correlation between the physical distances of *2L:7703202* and  
695 *2L:7705370* in the DGRP is  $r^2=0.8138$ . (C) Cycling of seasonal allele frequencies of candidate  
696 immune SNPs across three years. (D) Allele frequencies of candidate SNPs across the latitudinal  
697 gradient in the eastern United States. Only *Fadd* shows clinal variation with a clinal q-value of  
698 0.006.

699

700 Figure 3. Functional difference of seasonal *Tep3* alleles as defined by the focal SNPs. Mean +/-  
701 SE for bacterial load 24 hours post infection and survival 5 days post infection for the *Tep3*  
702 genotypes. (A) Higher survival for the spring genotype than the fall or combination genotypes  
703 when infected with *E. faecalis*. (B) Additive effect of alleles when infected with *P. rettgeri* (C)  
704 Lower constitutive *Tep3* mRNA expression in the rare *Tep3*<sup>CG</sup> haplotype in flies from the DGRP.  
705 (D-E) Frequency of *Tep3* haplotypes in the Pennsylvania orchard across seasonal time. (F)  
706 Minimum spanning network illustrates that linkage disequilibrium among the SNPs is  
707 maintained in distinct haplotypes.

708

709 Figure 4. Intergenic interactions among *Tep3*, *Dro6*, and *Fadd*. Non-additive interaction among  
710 *Tep3* and *Dro6* alleles. (A-B). No significant interaction among *Tep3* and *Fadd* SNPs (D-E).

711

## Tables and Figures

Table 1. Seasonal immune SNPs identified using whole-genome resequencing of the Pennsylvania spring and autumn populations across three consecutive years. SNPs with a seasonal q-value (SQ) < 0.3 are classified as seasonal and the SNPs investigated here are in bold. Most of seasonal SNPs do not have significant clinal q-values (CQ) and were not significant in a genome wide association study (GWAS) for response to *P. rettgeri* pathogenic infection [52]. The frequency of the SNPs at each collection date is indicated.

| Gene        | Position           | Effect                   | Molecular Function | SQ           | CQ           | GWAS         | PA 7.09      | PA 11.09     | PA 7.10      | PA 11.10     | PA 7.1       | PA 10.11     | PA 11.11     |
|-------------|--------------------|--------------------------|--------------------|--------------|--------------|--------------|--------------|--------------|--------------|--------------|--------------|--------------|--------------|
| Tep2        | 2L:2834400         | Upstream modifier        | effector           | 0.242        | 0.956        | 0.253        | 0.887        | 0.746        | 0.889        | 0.617        | 0.846        | 0.694        | 0.776        |
| <b>Tep3</b> | <b>2L:7703202</b>  | <b>NS coding</b>         | <b>effector</b>    | <b>0.243</b> | <b>0.159</b> | <b>0.420</b> | <b>0.657</b> | <b>0.356</b> | <b>0.515</b> | <b>0.361</b> | <b>0.500</b> | <b>0.424</b> | <b>0.590</b> |
| Tep3        | 2L:7703509         | Upstream modifier        | effector           | 0.151        | 0.529        | 0.084        | 0.840        | 0.567        | 0.813        | 0.667        | 0.838        | 0.677        | 0.694        |
| Tep3        | 2L:7703518         | Upstream modifier        | effector           | 0.220        | 0.643        | 0.084        | 0.825        | 0.554        | 0.803        | 0.671        | 0.831        | 0.710        | 0.706        |
| Tep3        | 2L:7703748         | Upstream modifier        | effector           | 0.271        | 0.819        | 0.114        | 0.827        | 0.524        | 0.700        | 0.661        | 0.750        | 0.569        | 0.818        |
| Tep3        | 2L:7703757         | Upstream modifier        | effector           | 0.291        | 0.956        | 0.632        | 0.748        | 0.476        | 0.488        | 0.541        | 0.664        | 0.367        | 0.618        |
| <b>Tep3</b> | <b>2L:7705370</b>  | <b>Upstream modifier</b> | <b>effector</b>    | <b>0.219</b> | <b>0.163</b> | <b>0.385</b> | <b>0.479</b> | <b>0.158</b> | <b>0.255</b> | <b>0.240</b> | <b>0.457</b> | <b>0.273</b> | <b>0.444</b> |
| bsk         | 2L:10247834        | Intron                   | signaling          | 0.300        | 0.822        | 0.255        | 0.716        | 0.680        | 0.571        | 0.500        | 0.826        | 0.470        | 0.778        |
| bsk         | 2L:10252450        | Intron                   | signaling          | 0.257        | 0.749        | 0.962        | 0.145        | 0.369        | 0.261        | 0.358        | 0.355        | 0.497        | 0.308        |
| Tep1        | 2L:15887030        | Downstream modifier      | effector           | 0.227        | 0.188        | 0.089        | 0.590        | 0.841        | 0.647        | 0.889        | 0.732        | 0.846        | 0.789        |
| Tep1        | 2L:15888031        | Downstream modifier      | effector           | 0.221        | 0.520        | NA           | 0.000        | 0.368        | 0.063        | 0.360        | 0.000        | 0.013        | 0.012        |
| cact        | 2L:16309682        | Downstream modifier      | signaling          | 0.135        | 0.782        | 0.829        | 0.850        | 0.667        | 0.649        | 0.426        | 0.704        | 0.407        | 0.474        |
| cact        | 2L:16310896        | Downstream modifier      | signaling          | 0.235        | 0.635        | 0.375        | 0.671        | 0.432        | 0.700        | 0.239        | 0.533        | 0.441        | 0.552        |
| cact        | 2L:16318067        | Intron                   | signaling          | 0.281        | 0.719        | 0.335        | 0.592        | 0.474        | 0.550        | 0.382        | 0.551        | 0.256        | 0.627        |
| sick        | 2L:19923496        | Intron                   | signaling          | 0.232        | 0.032        | 0.505        | 0.096        | 0.047        | 0.130        | 0.048        | 0.328        | 0.053        | 0.269        |
| IM1         | 2R:14270817        | Upstream modifier        | effector           | 0.256        | 0.695        | 0.423        | 0.358        | 0.075        | 0.571        | 0.193        | 0.213        | 0.115        | 0.390        |
| <b>Dro6</b> | <b>3L:3334769</b>  | <b>Upstream modifier</b> | <b>effector</b>    | <b>0.201</b> | <b>0.427</b> | <b>0.000</b> | <b>0.770</b> | <b>0.613</b> | <b>0.814</b> | <b>0.612</b> | <b>0.798</b> | <b>0.489</b> | <b>0.625</b> |
| Drs-1       | 3L:3336529         | Upstream modifier        | effector           | 0.251        | 0.975        | 0.028        | 0.778        | 0.483        | 0.893        | 0.768        | 0.783        | 0.682        | 0.813        |
| GGBP1       | 3L:18671289        | Downstream modifier      | recognition        | 0.187        | 0.150        | 0.729        | 0.116        | 0.458        | 0.240        | 0.393        | 0.230        | 0.315        | 0.271        |
| GGBP2       | 3L:18671295        | Downstream modifier      | recognition        | 0.218        | 0.167        | 0.666        | 0.144        | 0.472        | 0.255        | 0.407        | 0.257        | 0.344        | 0.294        |
| <b>Fadd</b> | <b>3R:17861054</b> | <b>UTR 3'modifier</b>    | <b>signaling</b>   | <b>0.200</b> | <b>0.006</b> | <b>0.822</b> | <b>0.669</b> | <b>0.250</b> | <b>0.369</b> | <b>0.353</b> | <b>0.638</b> | <b>0.411</b> | <b>0.410</b> |
| Fadd        | 3R:17861073        | UTR 3'modifier           | signaling          | 0.287        | 0.425        | 0.712        | 0.734        | 0.351        | 0.407        | 0.407        | 0.613        | 0.467        | 0.459        |
| kay         | 3R:25600668        | Intron                   | signaling          | 0.200        | 0.588        | 0.743        | 0.686        | 0.453        | 0.607        | 0.464        | 0.636        | 0.383        | 0.475        |
| Tak1        | X:20388404         | Intron                   | signaling          | 0.227        | 0.326        | 0.964        | 0.575        | 0.032        | 0.273        | 0.135        | 0.271        | 0.150        | 0.217        |

712

713

714

715 **Supplemental Material**

716

717 Figure S1. Related to Figure 1 Post infection survivorship curves for 5 days post infection across  
718 seasonal time. Population mean +/- SE.

719

720 Figure S2. Related to Figure 1 Microbial community associated with wild and F1 *Drosophila*  
721 *melanogaster* changes over space and time. *D. melanogaster* samples were collected as part of  
722 the *Drosophila* Real Time Evolution Consortium (Dros-RTEC 12 unpublished samples;  
723 <https://sites.sas.upenn.edu/paul-schmidt-lab/pages/opportunities>). DNA was extracted as  
724 described in [84]. Analysis was performed using a customized MOTHUR (v.1.36.0) [85] script  
725 that is available upon request. *Wolbachia* sequences were removed from the analysis.

726

727 Table S1. Related to Figure 3. Tep3 haplotypes in the 2012 Pennsylvania population. Focal  
728 SNPs are highlighted in black and the genotype combinations are highlighted: spring (blue), fall  
729 (red), high-frequency combination (purple), rare combination (grey).

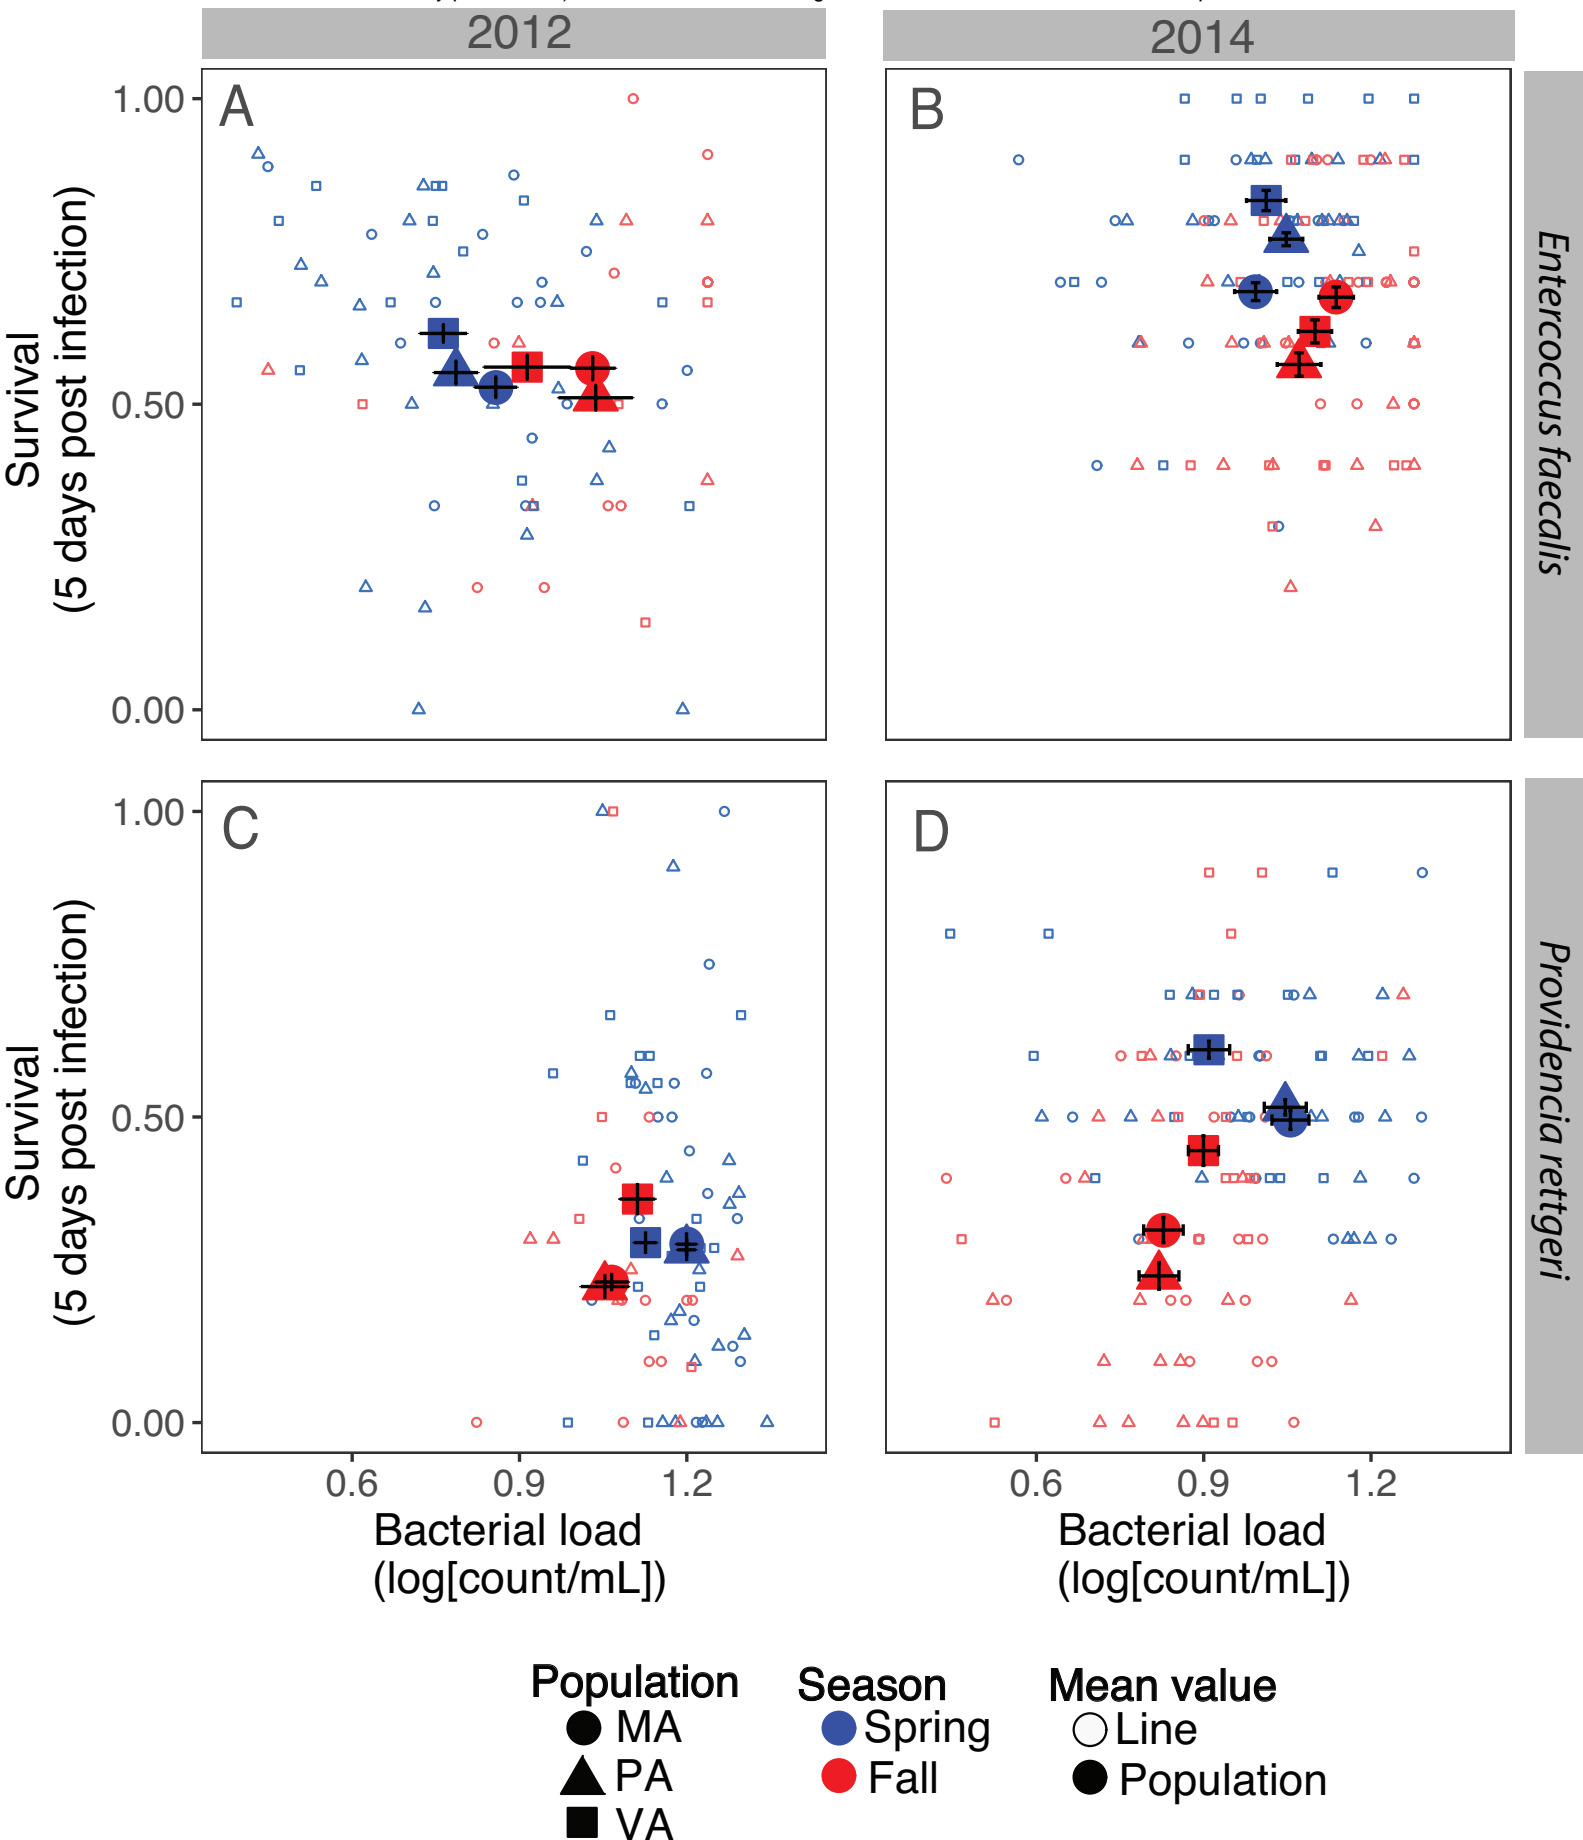

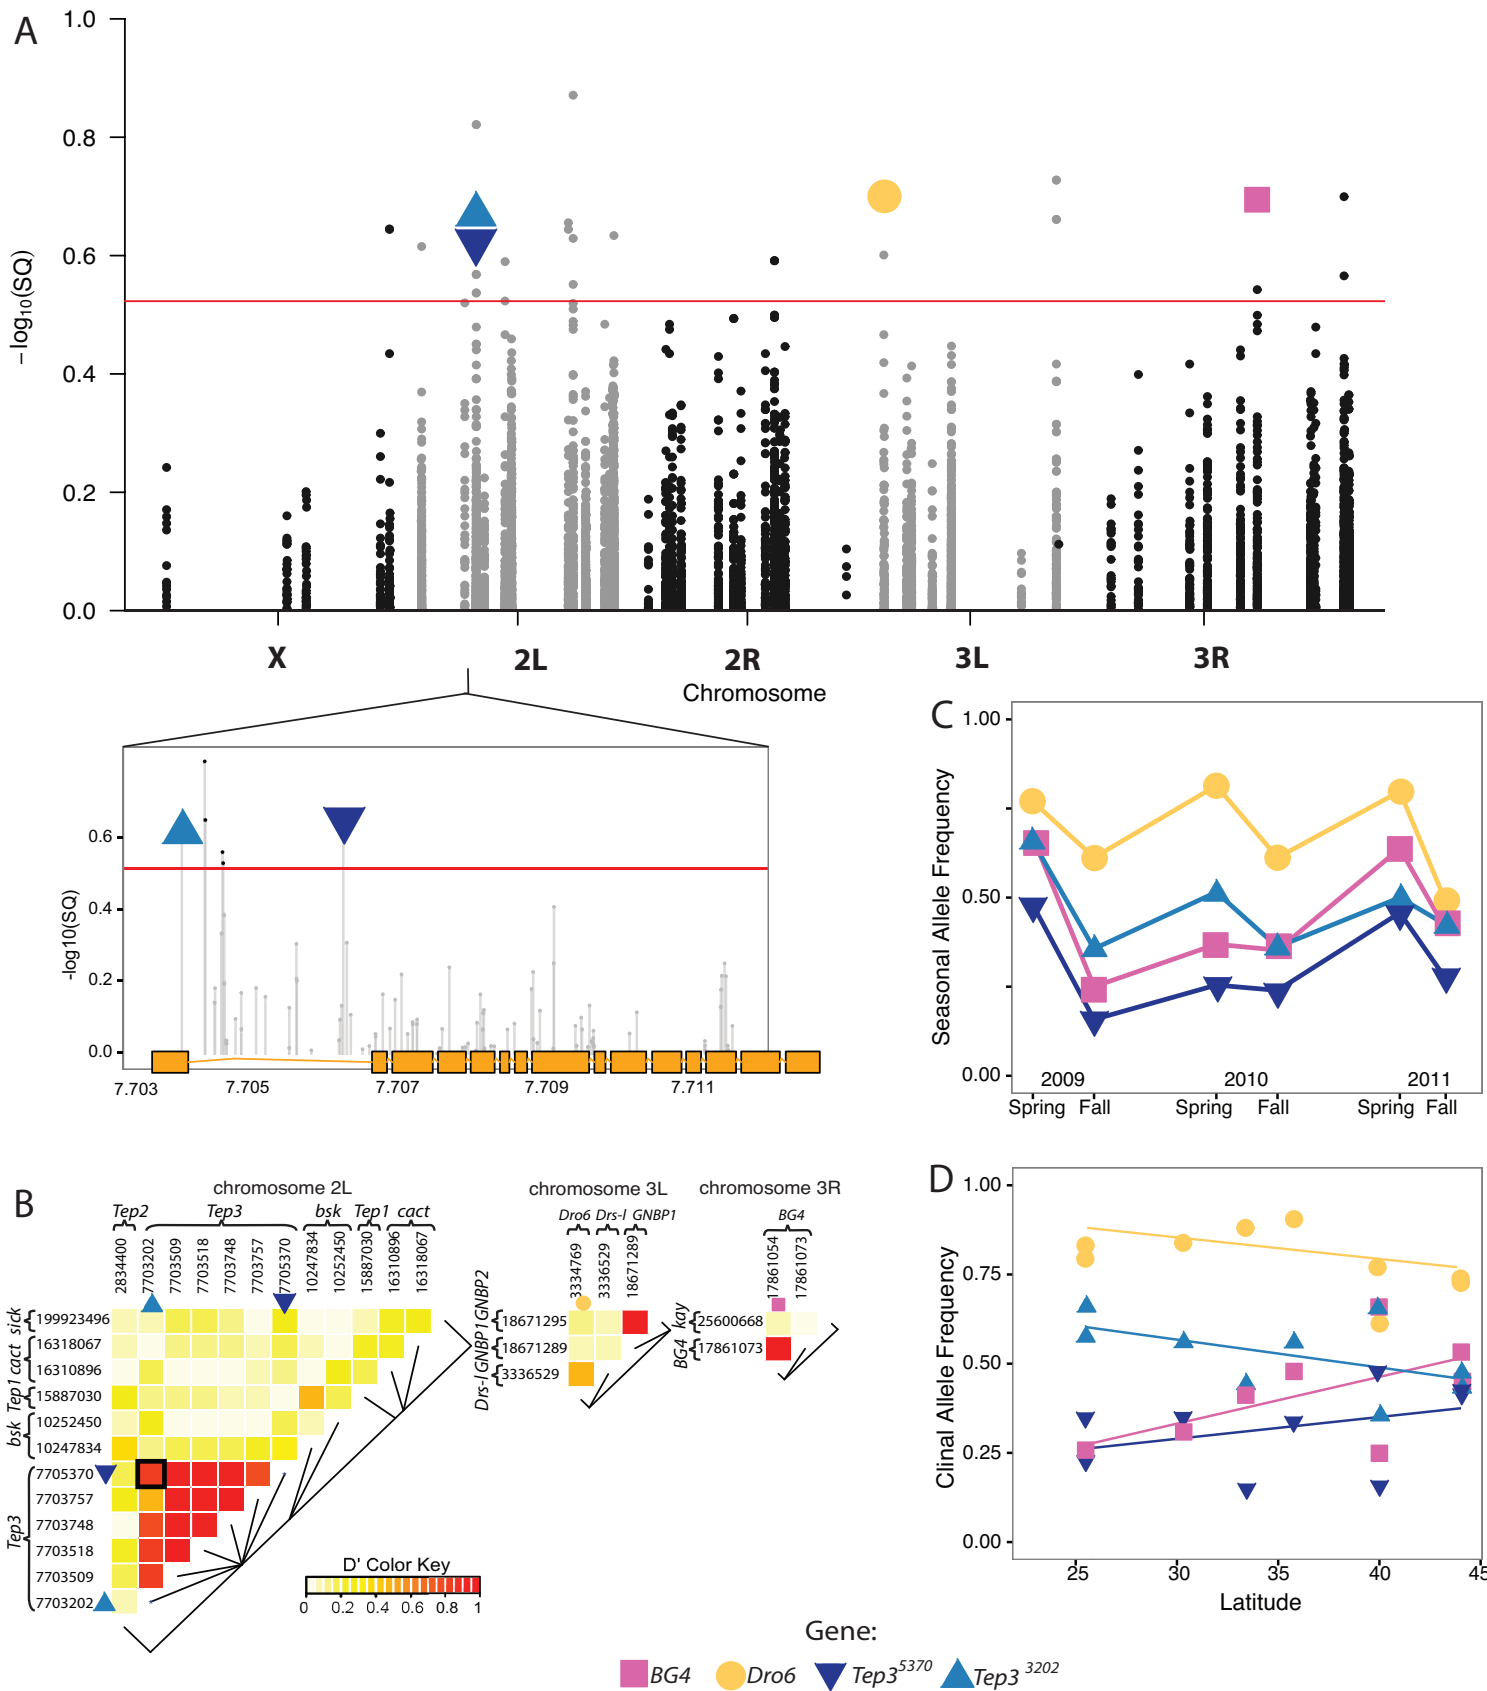



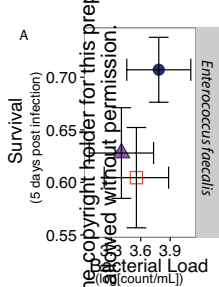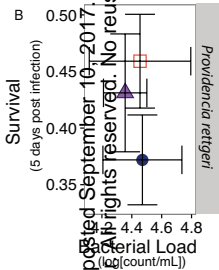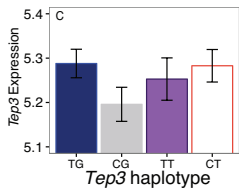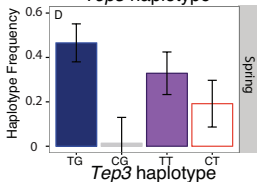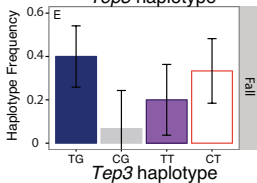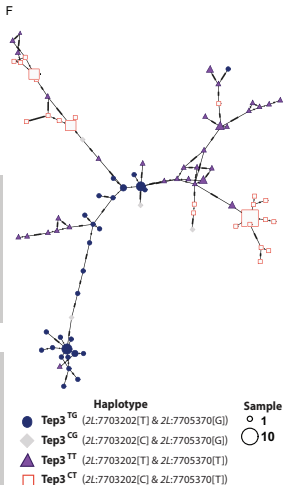

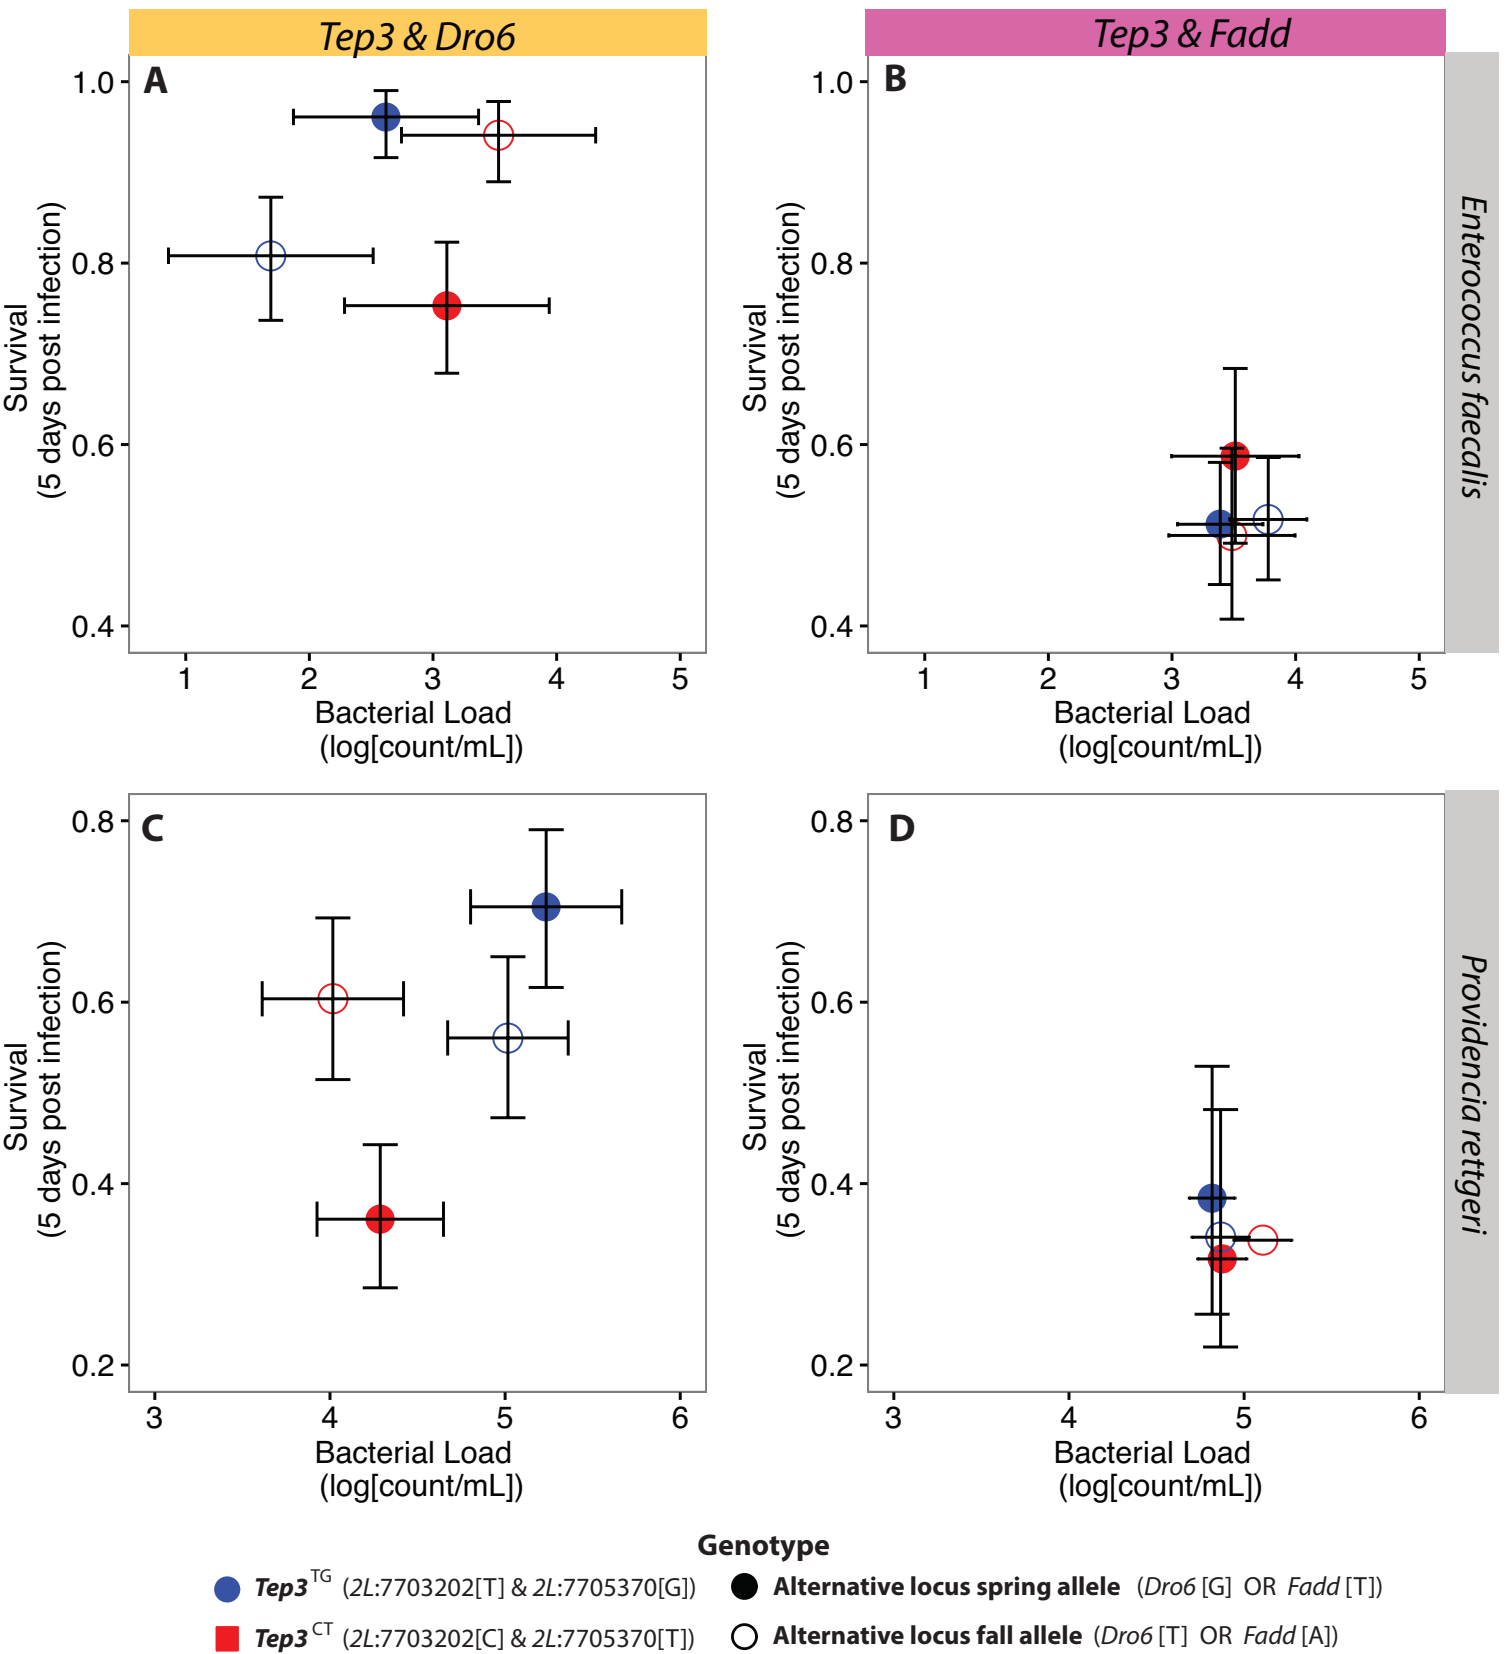

Source: http://www.biorxiv.org/content/10.1101/186882v1.full.pdf
